# Supplementary material
Source: HighWire-hosted journal article supplement (https://erj.ersjournals.com/content/56/2/2002411)
Supplement: inline-supplementary-material-1 [file inline-supplementary-material-1.pdf]

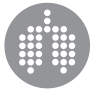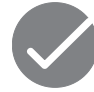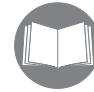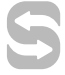

SHAREABLE PDF

# The value of serology testing to manage SARS-CoV-2 infections

Laia Fernández-Barat<sup>1,2,3</sup>, Ruben López-Aladid<sup>1,2,3</sup> and Antoni Torres <sup>1,2,3</sup>

**Affiliations:** <sup>1</sup>Cellex Laboratory, CibeRes (Centro de Investigación Biomédica en Red de Enfermedades Respiratorias, 06/06/0028), Institut d'Investigacions Biomèdiques August Pi i Sunyer (IDIBAPS), Barcelona, Spain. <sup>2</sup>School of Medicine, University of Barcelona, Barcelona, Spain. <sup>3</sup>Dept of Pneumology, Thorax Institute, Hospital Clinic of Barcelona, Barcelona, Spain.

**Correspondence:** Antoni Torres, Dept of Pneumology, Thorax Institute, Hospital Clinic of Barcelona, Villarroel 170, Barcelona, Catalunya 08036, Spain. E-mail: atorres@clinic.cat

 @ERSpublications

**Validated serology tests are a good complement for the SARS-CoV-2 RNA test, allow rapid epidemiological control and reveal immune status before and after vaccination.** <https://bit.ly/3eKAc6h>

**Cite this article as:** Fernández-Barat L, López-Aladid R, Torres A. The value of serology testing to manage SARS-CoV-2 infections. *Eur Respir J* 2020; 56: 2002411 [<https://doi.org/10.1183/13993003.02411-2020>].

This single-page version can be shared freely online.

The figures presented in the World Health Organization's latest report on the current status of the coronavirus disease 2019 (COVID-19) pandemic and the COVID-19 dashboard of the Johns Hopkins University of Medicine are quite similar: respectively, 6,416,828 and 6,656,827 cases worldwide, and 382 867 and 391 571 deaths [1, 2].
